1                                   **Decoupling SARS-CoV-2 ORF6 localization**  
2                                                           **and interferon antagonism**

3  
4                                   Running title: ORF6 localization and IFN antagonism

5  
6                                   **Hoi Tong Wong<sup>1</sup>, Victoria Cheung<sup>2</sup>, and Daniel J. Salamango<sup>1,3</sup>**

7  
8  
9                                   <sup>1</sup> Department of Microbiology and Immunology, Stony Brook University, Stony Brook,  
10                                   New York, USA, 11794

11                                   <sup>2</sup> Department of Biochemistry and Cell Biology, Stony Brook University, Stony Brook,  
12                                   New York, USA, 1194

13                                   <sup>3</sup> # Lead contact and Correspondence: Tel. +1-631-632-8472; Fax: +1-631-632-9797;  
14                                   Email: [daniel.salamango@stonybrook.edu](mailto:daniel.salamango@stonybrook.edu)

15  
16                                   **Abstract:** 176/180; **Figures:** 4; **Text:** ~3,000/3,000 words

20 **ABSTRACT**

21 Like many pathogenic viruses, SARS-CoV-2 must overcome interferon (IFN)-  
22 mediated host defenses for infection establishment. To achieve this, SARS-CoV-2  
23 deploys overlapping mechanisms to antagonize IFN production and signaling. The  
24 strongest IFN antagonist is the accessory protein ORF6, which localizes to multiple  
25 membranous compartments, including the nuclear envelope, where it directly binds the  
26 nuclear pore components Nup98-Rae1 to inhibit nuclear translocation of activated  
27 STAT1/IRF3 transcription factors. However, a direct cause-and-effect relationship  
28 between ORF6 localization and IFN antagonism has yet to be explored experimentally.  
29 Here, we use extensive mutagenesis studies to define the structural determinants  
30 required for steady-state localization and demonstrate that mis-localized ORF6 variants  
31 can still potently inhibit nuclear trafficking and IFN signaling. Additionally, expression of  
32 a peptide that mimics the ORF6/Nup98 interaction domain robustly inhibited nuclear  
33 trafficking. Furthermore, pharmacologic and mutational approaches combined to  
34 suggest that ORF6 is likely a peripheral-membrane protein, opposed to being a  
35 transmembrane protein as previously speculated. Thus, ORF6 localization and IFN  
36 antagonism are independent activities, which raises the possibility that ORF6 may have  
37 additional functions within membrane networks to enhance virus replication.

38

39

40

41

42

43

44

45 **KEY WORDS:** COVID-19; importin-alpha; innate immune suppression; peripheral  
46 membrane protein; subcellular localization

47

## 48 **INTRODUCTION**

49 Severe acute respiratory syndrome coronavirus-2 (SARS-CoV-2) is a novel  
50 coronavirus responsible for causing the coronavirus disease 2019 (COVID19)  
51 pandemic, which continues to be a persistent problem worldwide despite the availability  
52 of highly effective vaccines. A major barrier to wide-spread immunity has been the  
53 emergence of novel variants that exhibit significantly increased transmission rates.  
54 Pathogenicity is further enhanced through the activities of several viral proteins that  
55 suppress type I interferon (IFN) production and signaling. For instance, SARS-CoV-2  
56 NSP1, NSP6, NSP13, ORF6, ORF7b, ORF8, and Nucleoprotein all antagonize IFN  
57 signaling to various degrees, with ORF6 exhibiting the strongest inhibition (Lei et al.,  
58 2020; Miorin et al., 2020; Xia et al., 2020).

59 ORF6 is a 7 kilodalton accessory protein required for optimal virus replication *in*  
60 *vitro* and *in vivo*—likely through its ability to potently suppress IFN signaling (Silvas et  
61 al., 2021; Zhao et al., 2009; Zhou et al., 2010). Several studies have demonstrated that  
62 ORF6 induces cytoplasmic accumulation of importin $\alpha$  and importin $\beta$ , which  
63 subsequently inhibits nuclear translocation of activated STAT1 and IRF3 transcription  
64 factors (Frieman et al., 2007; Lei et al., 2020; Miorin et al., 2020). Additional mechanistic  
65 clarification was recently provided through proteomics studies that identified the Nup98-  
66 Rae1 nuclear pore complex as high-confidence ORF6 interactors (Gordon et al., 2020;

67 Miorin et al., 2020). Further investigation revealed that a direct interaction between the  
68 C-terminal tail of ORF6 and the C-terminal domain of Nup98-Rae1 impairs docking of  
69 cargo/receptor complexes to inhibit nuclear trafficking (Addetia et al., 2021; Kato et al.,  
70 2021; Miorin et al., 2020).

71 While suppression of antiviral innate immune signaling is believed to be its  
72 primary function, ORF6 also packages into nascent viral particles and induces  
73 membrane structures resembling viral replication compartments (Huang et al., 2007;  
74 Zhou et al., 2010). These activities coincide with ORF6 subcellular distribution, as it  
75 localizes to several membranous compartments during infection and when exogenously  
76 expressed in several different cell types (Gunalan et al., 2011; Kumar et al., 2007). Both  
77 native and epitope tagged ORF6 proteins colocalize with markers for the Golgi  
78 apparatus (Kato et al., 2021; Kopecky-Bromberg et al., 2007; Lei et al., 2020; Miorin et  
79 al., 2020; Xia et al., 2020; Zhou et al., 2010), endoplasmic reticulum (Kopecky-  
80 Bromberg et al., 2007; Lee et al., 2021; Lei et al., 2020; Zhou et al., 2010), endosomes  
81 (Gunalan et al., 2011; Kumar et al., 2007; Lee et al., 2021), and nuclear envelope  
82 (Addetia et al., 2021; Kato et al., 2021; Miorin et al., 2020), which is consistent with the  
83 current paradigm that ORF6 is a transmembrane protein capable of lateral diffusion  
84 within membranous networks (Netland et al., 2007; O'Keefe et al., 2021; Zhou et al.,  
85 2010). Taken together, these observations lend to an appealing model where ORF6  
86 localization at the nuclear envelope facilitates a direct interaction with Nup98-Rae1 to  
87 subsequently inhibit nuclear trafficking; however, this direct cause-and-effect  
88 relationship has yet to be examined experimentally.

89           Here, we investigate the link between ORF6 localization and IFN antagonism.  
90 Through an extensive panel of truncation and single amino acid substitution mutants in  
91 combination with pharmacologic experiments, we demonstrate that ORF6 associates  
92 with membranous compartments through two distinct structural determinants and is  
93 most likely a peripheral-membrane protein. The first determinant resides within amino  
94 acid residues <sup>18</sup>IMRTFKV<sup>24</sup> and is required for Golgi retention. The second determinant  
95 encompasses two putative amphipathic helices required for maintaining steady-state  
96 localization and membrane association. Importantly, mis-localized ORF6 variants  
97 potently induced cytoplasmic accumulation of importin $\alpha$ , inhibited nuclear translocation  
98 of activated STAT1, and suppressed IFN signaling. In further support of these  
99 observations, a peptide inhibitor that contains the ORF6/Nup98 interaction motif  
100 robustly blocked nuclear accumulation of importin $\alpha$ . Taken together, these results  
101 demonstrate that membrane association of ORF6 is dispensable for interferon  
102 antagonism, which raises the possibility that ORF6 may have additional functions within  
103 membrane networks.

104

## 105 **RESULTS AND DISCUSSION**

### 106 **Identification of ORF6 localization determinants**

107           Native and epitope tagged SARS-CoV-2 ORF6 proteins localize to several  
108 membranous organelles; however, the determinants that dictate subcellular distribution  
109 have yet to be thoroughly investigated. To identify which protein region mediates  
110 steady-state localization, a panel of ORF6-mCherry truncation mutants were generated  
111 and co-expressed in HeLa cells with markers for the ER and Golgi apparatus (**Fig. 1**). A

112 computational model was used to generate truncations that minimized perturbations to  
113 putative structural elements as a structure has yet to be solved (**Fig. 1A**). Because the  
114 C-terminal region of ORF6 is required for interacting with Nup98-Rae1 and for inducing  
115 cytoplasmic accumulation of importin $\alpha$  (Frieman et al., 2007; Miorin et al., 2020), we  
116 reasoned that any *cis*-acting localization determinants reside upstream of this  
117 protein/protein interaction domain. As expected, expression of amino acid residues 1-47  
118 in HeLa cells resulted in localization comparable to wild-type, while expression of  
119 residues 48-61 had no discernable localization pattern (**Fig. 1B**). Unexpectedly, when  
120 we further examined the 1-47 segment for *cis*-acting residues that dictate localization,  
121 we were surprised to observe two distinct localization patterns. Expression of the first  
122 half of this segment (amino acid residues 1-23) resulted in partial colocalization with the  
123 Golgi marker, while expression of the second half (amino acid residues 24-47) resulted  
124 in localization to an organelle distinct from the ER (**Fig. 1B**, 1-23 and 24-47, merge).  
125 When the 1-23 segment was further truncated to residues 1-17, no localization pattern  
126 was observed, suggesting that Golgi retention is partially mediated by amino acid  
127 residues <sup>18</sup>IMRTFKV<sup>24</sup> (**Fig. 1B**).

128 Because the 1-23 fragment only partially recapitulated Golgi retention, we  
129 reasoned that the putative helix within residues 24-47 is required for maintaining steady-  
130 state localization, since when expressed alone it non-specifically associated with a  
131 membranous compartment. Therefore, we generated a truncation construct that  
132 expressed amino acid residues 18-47 anticipating it would mimic wild-type distribution;  
133 instead, this mutant localized to the ER-adjacent organelle, suggesting that the putative  
134 helix contained within the 1-17 fragment also contributes to steady-state localization

135 **(Fig. 1B, 1-47 and 18-47, merge)**. These observations suggested that ORF6 maintains  
136 steady-state localization through at least two distinct determinants, a longer protein  
137 component from residues 1-47 that mediates steady-state membrane associations, and  
138 a second region from <sup>18</sup>IMRTFKV<sup>24</sup> that dictates Golgi retention. To test this model, we  
139 initially focused on <sup>18</sup>IMRTFKV<sup>24</sup> to determine if it harbors a Golgi retention motif.  
140 Substitution of <sup>18</sup>IMRTFKV<sup>24</sup> to alanine in full length ORF6 not only disrupted Golgi  
141 accumulation but induced freely diffuse intracellular puncta (**Fig. 1C, 18-24Ala**). Further  
142 investigation into the conservation of this motif revealed that SARS-CoV-1, bat, and  
143 pangolin ORF6 proteins also require this motif to facilitate Golgi retention (**Fig. 1C**). Of  
144 note, SARS-CoV-1 and bat 18-24Ala mutants did not form intracellular puncta as  
145 compared to SARS-CoV-2 and pangolin ORF6, but exhibited strong colocalization with  
146 the ER marker, suggesting there is an inherent difference in the way these proteins  
147 associate with membranes (**Fig. 1C, merge**). It is possible this difference is attributable  
148 to the putative helix from residues 24-47, as there is only ~50% amino acid identity  
149 within this region across species (**Fig. 1A**).

150 While no strict consensus motif has been defined for Golgi retention, numerous  
151 Golgi resident proteins maintain steady-state localization through motifs enriched with  
152 positively charged amino acid residues (Tu et al., 2012; Wang et al., 2020); and  
153 interestingly, <sup>18</sup>IMRTFKV<sup>24</sup> contains arginine and lysine residues at positions 20 and 23,  
154 respectively. To test the contribution of these residues to Golgi retention, we generated  
155 single and double amino acid substitution mutants at these positions and assessed  
156 localization patterns. Independently exchanging these residues for glutamate had little  
157 impact on ORF6 localization when expressed in HeLa cells; however, the RK20,23EE

158 double mutant lost Golgi retention and localized to the ER-adjacent organelle, raising  
159 the possibility that electrostatic interactions may facilitate ORF6 targeting to the Golgi  
160 (**Fig. 1D**, merge). This speculation is intriguing given that the Golgi membrane is  
161 enriched with phosphatidylinositol-4-phosphate lipids, which unlike phosphatidylcholine,  
162 ethanolamine, and serine, contain negatively charged headgroups.

163 Because several of the ORF6 mutants strongly localized to an ER-adjacent  
164 organelle, we co-expressed relevant ORF6 mutants with markers for the most likely  
165 candidates to identify this compartment (*i.e.*, mitochondria and ER-Golgi-intermediate  
166 compartment). Interestingly, all ER-adjacent mutants exhibited significant colocalization  
167 with the mitochondria, but not with the ER-Golgi-intermediate compartment (**Fig. 1E**,  
168 and data not shown).

169

### 170 **SARS-CoV-2 ORF6 is likely a peripheral-membrane protein**

171 While fine-mapping ORF6 localization determinants, several of the mutants  
172 exhibited colocalization with the mitochondria (SARS-CoV-2 18-24, 24-47, and RK-EE)  
173 or ER (SARS-CoV-1 and bat 18-24Ala), raising the possibility that a second determinant  
174 drives association with membranous compartments (**Fig. 1**). Because it has been  
175 reported that transmembrane domains of Golgi resident proteins contribute to steady-  
176 state localization (Banfield, 2011; Hu et al., 2011; Wang et al., 2013), we reasoned that  
177 the putative ORF6 alpha helices identified in the computational model contribute to  
178 localization. To explore this possibility, we closely examined the amino acid composition  
179 of these helices looking for clues as to how they might associate with membranous  
180 compartments. We were surprised to discover that ORF6 exhibits a biased hydrophobic



181 index and is predicted to be an amphipathic protein (**Figs. 2A** and **2B**). From these  
182 observations, we postulated two models to explain how ORF6 could be amphipathic  
183 and localize to membranous compartments. First, ORF6 is a transmembrane protein  
184 that forms higher order homo- or hetero-oligomers that shield the hydrophilic surface  
185 from the hydrophobic membrane environment. Second, ORF6 is a peripheral-  
186 membrane protein that orients the hydrophilic helical surfaces toward the cytoplasm and  
187 buries the hydrophobic portion within membrane surfaces.

188 To explore these models, we generated and tested single amino acid substitution  
189 mutants that exchanged the wild-type residue for one with opposing biophysical  
190 properties on the respective helical surfaces. As depicted in **Figs. 2B** and **2C**, polar  
191 residues were replaced with tryptophan, charged residues were exchanged with  
192 opposing charge, hydrophobic residues were replaced with glutamate, and localization  
193 was assessed. If ORF6 is a transmembrane protein that requires intramembrane  
194 oligomerization, we postulated that substitutions made to either surface would disrupt  
195 localization. However, if ORF6 is a peripheral-membrane protein, only substitutions  
196 made to the hydrophobic membrane-interacting surface would exhibit disrupted  
197 localization. In support of the latter scenario, ORF6 mutants with substitutions on the  
198 hydrophilic surface exhibited normal localization; however, all ORF6 mutants with  
199 substitutions on the hydrophobic surface mis-localized (**Figs. 2B**, red asterisks; and **2C**,  
200 dashed boxes). Taken together, these results suggest that SARS-CoV-2 ORF6 is likely  
201 a peripheral-membrane protein that maintains steady-state localization through the  
202 <sup>18</sup>IMRTFKV<sup>24</sup> region and this contiguous hydrophobic surface.

203 To further explore the possibility that SARS-CoV-2 is a peripheral-membrane

204 protein, we examined localization patterns in the presence of brefeldin A (BFA) and  
205 cycloheximide (CHX). Brefeldin A is a well characterized fungal toxin that promotes  
206 Golgi disassembly by inhibiting trafficking between the Golgi and ER compartments,  
207 subsequently resulting in the rapid redistribution of Golgi proteins to the ER (Lippincott-  
208 Schwartz et al., 1989). We reasoned if ORF6 peripherally associates with Golgi  
209 membranes, BFA treatment would induce cytoplasmic accumulation of ORF6, whereas  
210 if it's a transmembrane protein, it would relocate to the ER. The inclusion of the protein  
211 translation inhibitor CHX allows for tracking of steady-state ORF6 protein rather than  
212 observing newly synthesized protein that may artificially accumulate in the cytoplasm  
213 due to loss of the Golgi apparatus. As depicted in **Fig. 3A**, HeLa cells treated with BFA  
214 exhibited loss of Golgi stacks and subsequent redistribution of the Golgi marker to the  
215 ER. Importantly, BFA treatment induced SARS-CoV-2 ORF6 puncta accumulation in the  
216 cytoplasm, which resembled the 18-24Ala mutant that lacks the Golgi retention motif  
217 (**Figs. 1C** and **3A**). Interestingly, we did not observe the same phenomenon for SARS-  
218 CoV-1 ORF6 which fully redistributed to the ER, also mimicking its cognate 18-24Ala  
219 mutant (**Figs. 1C** and **3A**). Next, we wanted to determine if SARS-CoV-2 ORF6 puncta  
220 could re-associate with nascent Golgi membranes following BFA washout. As shown in  
221 **Fig. 3B**, HeLa cells imaged following BFA washout exhibited redistribution of the Golgi  
222 marker from the ER to discrete puncta in the cytoplasm, which were most likely  
223 reassembling Golgi stacks. Likewise, SARS-CoV-2 ORF6 colocalized with these Golgi  
224 puncta, whereas SARS-CoV-1 ORF6 remained colocalized with the ER following  
225 washout, suggesting that the cytoplasmic SARS-CoV-2 ORF6 proteins could more  
226 readily associate with nascent Golgi stacks (**Fig. 3B**). To further confirm BFA treatment

227 induced redistribution of SARS-CoV-2 ORF6 proteins to the cytoplasm, we treated cells  
228 with BFA and then with digitonin. Digitonin is a non-ionic detergent that selectively  
229 permeabilizes the plasma membrane while leaving other membranous compartments  
230 intact. If SARS-CoV-2 ORF6 is indeed released from the Golgi membrane following  
231 BFA treatment, we hypothesized that ORF6 would deplete from the cytoplasm following  
232 digitonin treatment. First, we assessed the behavior of cells coexpressing mCherry and  
233 the Golgi marker to ensure digitonin treatment would only disrupt mCherry accumulation  
234 and not the Golgi apparatus. As expected, digitonin treatment, but not BFA treatment,  
235 resulted in a significant depletion of mCherry fluorescence in transfected cells as  
236 indicated by fluorescence microscopy and flow cytometry (**Fig. 3C**). Furthermore, the  
237 Golgi marker only exhibited differential distribution in the presence of BFA, not digitonin,  
238 indicating that the detergent was not grossly disrupting the structure of the Golgi. When  
239 HeLa cells expressing SARS-CoV-2 ORF6 were treated with digitonin alone, no impact  
240 on protein abundance or localization was observed (**Fig. 3C**). However, when cells were  
241 treated with BFA and then with digitonin, we observed significantly decreased  
242 fluorescence intensity for ORF6 but not the Golgi marker (**Fig. 3C**). Taken together,  
243 these observations combined with the mutational data in **Figs. 1** and **2** strongly support  
244 the model that SARS-CoV-2 ORF6 is a peripheral-membrane protein, and likely  
245 explains how some variants can non-specifically associate with membranous  
246 compartments (*i.e.*, 18-24, RK-EE, and 24-47 mutants).

247

## 248 **Membrane association of ORF6 is not required for interferon antagonism**

249 ORF6 inhibits interferon synthesis and signaling by blocking nuclear translocation

250 of activated STAT1 and IRF3 transcription factors through a direct interaction with  
251 Nup98-Rae1 (Frieman et al., 2007; Kato et al., 2021; Kopecky-Bromberg et al., 2007;  
252 Lei et al., 2020; Miorin et al., 2020; Xia et al., 2020). The most likely scenario is that  
253 ORF6 accumulation at the nuclear envelop facilitates a direct interaction with Nup98-  
254 Rae1 to block nuclear trafficking; however, this relationship has yet to be explored  
255 experimentally. To determine if membrane association is required for inhibiting nuclear  
256 trafficking, we examined a panel of localization disrupted mutants for their ability to  
257 block eGFP-KPNA2 trafficking. To ensure that ORF6 function was not altered due to the  
258 presence of the C-terminal mCherry tag, we generated a mCherry-T2A-ORF6 “self-  
259 cleaving” expression cassette, which allows for efficient detection of transfected cells  
260 without having to epitope-tag ORF6 (Salamango et al., 2019). For these experiments,  
261 we stably introduced eGFP-KPNA2 in the type II alveolar lung epithelial cell line A549 to  
262 test ORF6 activity in a more physiologically relevant cell model. Remarkably, all mutants  
263 tested were able to induce cytoplasmic accumulation of eGFP-KPNA2 at efficiencies  
264 comparable to wild-type (representative images in **Fig. 4A**, quantification in **Fig. 4C**).  
265 Next, we wanted to confirm these mutants also block nuclear accumulation of activated  
266 STAT1. To probe this activity, we treated A549 cells with type I IFN and assessed  
267 STAT1 localization in the presence or absence of ORF6 proteins. As anticipated, all  
268 mutants could inhibit nuclear accumulation of STAT1 at efficiencies comparable to wild-  
269 type (representative images in **Fig. 4B**, quantification in **Fig. 4D**). Furthermore, we  
270 assessed the ability of these mutants to inhibit interferon signaling using an IFN $\beta$ -eGFP  
271 reporter construct. We transiently co-expressed the IFN $\beta$  reporter with an activating  
272 RIG-I mutant (Mibayashi et al., 2007) in the presence or absence of the indicated ORF6

273 proteins and assessed eGFP expression. As depicted in **Fig. 4E**, both wild-type and  
274 mutant ORF6 proteins could efficiently suppress eGFP expression following stimulation  
275 with the activating RIG-I mutant. Lastly, to further confirm that membrane association is  
276 not required for inhibition of nuclear trafficking, we generated an inhibitor construct by  
277 fusing 3x copies of the ORF6/Nup98 interaction domain to mCherry and assessed  
278 eGFP-KPNA2 relocalization. As depicted in **Figs. 4F** and **4G**, expression of this  
279 construct was sufficient to drive cytoplasmic accumulation of eGFP-KPNA2.

280         Based on our findings here, it is evident that ORF6 localization is independent  
281 from IFN antagonism and raises the possibility that ORF6 may have additional functions  
282 within membrane networks to enhance viral replication.

283

## 284 **MATERIALS AND METHODS**

### 285 **Cell culture and cloning**

286 A549, HEK293FT, and HeLa cells were maintained in RPMI (Hyclone, South Logan,  
287 UT) supplemented with 10% FBS (Gibco, Gaithersburg, MD) and 0.5% pen/strep (50  
288 units). Cells were transfected with PEI using a ratio of 3  $\mu$ L per 1  $\mu$ g of DNA. To  
289 generate the A549 eGFP-KPNA2 stable cell line, roughly 250,000 HEK293FT cells in a  
290 6-well plate were transfected with a pQCXIH retroviral vector containing the eGFP-  
291 KPNA2 expression cassette, an MLV-GagPol packaging vector, and a VSV-G vector.  
292 Media was harvested 48 hours post-transfection and frozen at  $-80^{\circ}\text{C}$  for 4-6 hours,  
293 thawed and centrifuged at 1500 x g, and overlaid on A549 cells. To generate a pure cell  
294 population, cells were treated with hygromycin B (Sigma, 500  $\mu$ g/ml) 48 hours post-  
295 transduction. All ORF6 mutants were generated by PCR amplification using Phusion

296 high fidelity DNA polymerase (NEB, Ipswich, MA) and overlapping PCR to introduce the  
297 indicated mutations. To generate the peptide inhibitor construct, we fused 3x tandem  
298 copies of the ORF6/Nup98 interaction domain separated by 12 amino acid  
299 glycine/serine/threonine linkers (repeat peptide sequence: KYSQLDEEQPMEID) to the  
300 C-terminus of mCherry. The IFN $\beta$  reporter construct was generated by cloning an IFN  
301 responsive promoter element upstream of eGFP in the pcDNA-5TO expression vector  
302 and the constitutively active RIG-I mutant vector was generated by cloning RIG-I amino  
303 acids 1-242 into an mTagBFP2-T2A- expression cassette in a lentiviral vector. All  
304 constructs were confirmed by restriction digestion and Sanger sequencing.

305 For experiments using the IFN $\beta$  and RIG-I expression constructs, roughly  
306 250,000 A549 cells were seeded into 12 well culture plates and allowed to adhere  
307 overnight. The next day, cells were co-transfected with the indicated combinations of  
308 IFN $\beta$ -eGFP reporter, activating RIG-I, and ORF6 expression plasmids at 100 ng DNA  
309 per construct. At 48 hours post-transfection, eGFP fluorescence was quantified (ImageJ  
310 software) and then graphed with Prism 6.0 (GraphPad Software).

311

## 312 **Fluorescence microscopy and immunostaining**

313 All localization and immunostaining experiments were repeated at least 3 independent  
314 times and representative images are depicted from surveying at least 5 fields of view  
315 from each condition with at least 25-30 cells exhibiting similar phenotypes (all scale bars  
316 shown are at 10  $\mu$ m). In addition, localization experiments were carried out using HeLa  
317 cells as they are routinely used for microscopy experiments and localization studies due  
318 to their morphological characteristics. Roughly 6,500 HeLa cells were seeded into an 8-

319 well #1.5 glass bottom chamber slide (Ibidi #80826) and transfected with 100 ng of the  
320 indicated ORF6 expression construct along with either 50 ng of an ER marker (eGFP-  
321 Calnexin; Addgene: 57122), 50 ng of a Golgi marker [mTag- $\beta$ -galactosidase (1-61)], or  
322 50 ng of a mitochondrial marker (eBFP2-Mito, Addgene: 55248). The next day, cells  
323 were imaged using a 60x oil immersion objective on an EVOS M5000 fluorescence  
324 microscope.

325         Prior to immuno-labeling and imaging of STAT1, A549 cells were treated with  
326 3000 U/mL type I interferon for 45 minutes. Immuno-labeling of STAT1 was performed  
327 as follows: 24 hours post transfection, cells were washed with PBS and fixed in 4% PFA  
328 at room temperature for 10 minutes. Following fixation, cells were washed using  
329 PBS+0.3% Triton X-100 (PBST) three times in 5-minute intervals and then blocked  
330 using PBST supplemented with 5% BSA, 10% goat serum, and 0.3 M glycine for 1 hour  
331 at room temperature. After blocking, samples were incubated with primary anti-STAT1  
332 antibody (Cell Signaling Technology, 9172) in PBST with 5% BSA overnight at 4  
333 degrees. The next day, samples were washed 3 times with PBS and then incubated  
334 with secondary  
335 anti-Rabbit-AlexaFluor488 (Cell Signaling Technology, 4412) and anti-mCherry-  
336 AlexaFluor594 (Invitrogen #M11240) antibodies in PBS with 5% BSA for 1 hour at room  
337 temperature. Finally, cells were washed 3 times with PBS and then imaged at 60x on an  
338 EVOS M5000 fluorescence microscope. For quantification of nuclear fluorescence,  
339 individual cells expressing the indicated ORF6 proteins were scored for KPNA2 or  
340 STAT1 localization by dividing the nuclear fluorescence intensity by the cytoplasmic  
341 fluorescence intensity (n=50 for KPNA2 and n=25 for STAT1), and then graphed with

342 Prism 6.0 (GraphPad Software). Subcellular compartments were defined based on  
343 DAPI staining (nucleus).

344

### 345 **Chemical inhibitor treatments**

346 For BFA/CHX inhibitor treatments, culture media was replaced with complete media  
347 supplemented with 5  $\mu$ M BFA and 2  $\mu$ M CHX and allowed to incubate for 30 minutes  
348 prior to imaging. For inhibitor washout, samples were rinsed with PBS following an initial  
349 30-minute BFA/CHX incubation and then complete media supplemented with 2  $\mu$ M CHX  
350 was added. Cells were allowed to recover for 30 minutes before imaging reconstitution  
351 of the Golgi apparatus. For digitonin treatments, transfected cells were either left  
352 untreated, treated with 50  $\mu$ g digitonin for 10 minutes, treated with 5  $\mu$ M BFA/2  $\mu$ M CHX  
353 for 30 minutes, or, treated with 5  $\mu$ M BFA/2  $\mu$ M CHX for 30 minutes and then with 50  $\mu$ g  
354 digitonin for 10 minutes.

355

### 356 **Flow cytometry**

357 All flow cytometry experiments were repeated 3 independent times and representative  
358 histograms are depicted from one experiment. Quantification of fluorescence intensity  
359 was performed using a Becton Dickinson FACScan flow cytometer. Briefly, roughly  
360 125,000 HeLa cells were seeded into a 12 well plate and transfected 24 hours after  
361 plating with 300 ng of the indicated ORF6/fluorescent protein DNA and 200 ng of DNA  
362 for the Golgi marker. The next day, cells were treated as described above with the  
363 following exception: digitonin treatment was not performed until after cells were  
364 removed from culture plates to better preserve cell integrity. Following inhibitor



365 treatment, cells were removed from plates using 0.025% Trypsin/EDTA solution,  
366 centrifuged at 300 x g for 5 minutes, and then re-suspended in 2% FBS + 5  $\mu$ M BFA/2  
367  $\mu$ M CHX in PBS. At this point, 50  $\mu$ g of digitonin was added for 10 minutes and samples  
368 were subjected to flow cytometry and analyzed using FloJo software.

369

## 370 **ACKNOWLEDGEMENTS**

371 We thank Drs. Erich Mackow, Nancy Reich-Marshall, and Patrick Hearing for intellectual  
372 discussions and constructive feedback. This work was supported by startup funds  
373 provided by the Department of Microbiology and Immunology and Renaissance School  
374 of Medicine at Stony Brook University. All authors declare no conflict of interest.

375

## 376 **REFERENCES**

377 **Addetia, A., Lieberman, N. A. P., Phung, Q., Hsiang, T. Y., Xie, H., Roychoudhury,**  
378 **P., Shrestha, L., Loprieno, M. A., Huang, M. L., Gale, M. et al.** (2021). SARS-CoV-2 ORF6  
379 Disrupts Bidirectional Nucleocytoplasmic Transport through Interactions with Rae1 and Nup98.  
380 *mBio* **12**, e00065-21.

381 **Banfield, D. K.** (2011). Mechanisms of protein retention in the Golgi. *Cold Spring Harb*  
382 *Perspect Biol* **3**, a005264.

383 **Frieman, M., Yount, B., Heise, M., Kopecky-Bromberg, S. A., Palese, P. and Baric,**  
384 **R. S.** (2007). Severe acute respiratory syndrome coronavirus ORF6 antagonizes STAT1  
385 function by sequestering nuclear import factors on the rough endoplasmic reticulum/Golgi  
386 membrane. *J Virol* **81**, 9812-24.

387 **Gordon, D. E. Jang, G. M. Bouhaddou, M. Xu, J. Obernier, K. White, K. M. O'Meara,**  
388 **M. J. Rezelj, V. V. Guo, J. Z. Swaney, D. L. et al.** (2020). A SARS-CoV-2 protein interaction  
389 map reveals targets for drug repurposing. *Nature* **583**, 459-468.

390 **Gunalan, V., Mirazimi, A. and Tan, Y. J.** (2011). A putative diacidic motif in the SARS-  
391 CoV ORF6 protein influences its subcellular localization and suppression of expression of co-  
392 transfected expression constructs. *BMC Res Notes* **4**, 446.

393 **Hu, L., Li, L., Xie, H., Gu, Y. and Peng, T.** (2011). The Golgi localization of GOLPH2  
394 (GP73/GOLM1) is determined by the transmembrane and cytoplasmic sequences. *PLoS One* **6**,  
395 e28207.

396 **Huang, C., Peters, C. J. and Makino, S.** (2007). Severe acute respiratory syndrome  
397 coronavirus accessory protein 6 is a virion-associated protein and is released from 6 protein-  
398 expressing cells. *J Virol* **81**, 5423-6.

399 **Kato, K., Ikliptikawati, D. K., Kobayashi, A., Kondo, H., Lim, K., Hazawa, M. and**  
400 **Wong, R. W.** (2021). Overexpression of SARS-CoV-2 protein ORF6 dislocates RAE1 and  
401 NUP98 from the nuclear pore complex. *Biochem Biophys Res Commun* **536**, 59-66.

402 **Kopecky-Bromberg, S. A., Martínez-Sobrido, L., Frieman, M., Baric, R. A. and**  
403 **Palese, P.** (2007). Severe acute respiratory syndrome coronavirus open reading frame (ORF)  
404 3b, ORF 6, and nucleocapsid proteins function as interferon antagonists. *J Virol* **81**, 548-57.

405 **Kumar, P., Gunalan, V., Liu, B., Chow, V. T., Druce, J., Birch, C., Catton, M.,**  
406 **Fielding, B. C., Tan, Y. J. and Lal, S. K.** (2007). The nonstructural protein 8 (nsp8) of the  
407 SARS coronavirus interacts with its ORF6 accessory protein. *Virology* **366**, 293-303.

408 **Lee, J. G., Huang, W., Lee, H., van de Leemput, J., Kane, M. A. and Han, Z.** (2021).  
409 Characterization of SARS-CoV-2 proteins reveals Orf6 pathogenicity, subcellular localization,  
410 host interactions and attenuation by Selinexor. *Cell Biosci* **11**, 58.

411 **Lei, X., Dong, X., Ma, R., Wang, W., Xiao, X., Tian, Z., Wang, C., Wang, Y., Li, L.,**  
412 **Ren, L. et al.** (2020). Activation and evasion of type I interferon responses by SARS-CoV-2. *Nat*  
413 *Commun* **11**, 3810.

414 **Lippincott-Schwartz, J., Yuan, L. C., Bonifacino, J. S. and Klausner, R. D.** (1989).  
415 Rapid redistribution of Golgi proteins into the ER in cells treated with brefeldin A: evidence for  
416 membrane cycling from Golgi to ER. *Cell* **56**, 801-13.

417 **Mibayashi, M., Martínez-Sobrido, L., Loo, Y. M., Cárdenas, W. B., Gale, M. and**  
418 **García-Sastre, A.** (2007). Inhibition of retinoic acid-inducible gene I-mediated induction of beta  
419 interferon by the NS1 protein of influenza A virus. *J Virol* **81**, 514-24.

420 **Miorin, L., Kehrer, T., Sanchez-Aparicio, M. T., Zhang, K., Cohen, P., Patel, R. S.,**  
421 **Cupic, A., Makio, T., Mei, M., Moreno, E. et al.** (2020). SARS-CoV-2 Orf6 hijacks Nup98 to  
422 block STAT nuclear import and antagonize interferon signaling. *Proc Natl Acad Sci U S A* **117**,  
423 28344-28354.

424 **Netland, J., Ferraro, D., Pewe, L., Olivares, H., Gallagher, T. and Perlman, S.** (2007).  
425 Enhancement of murine coronavirus replication by severe acute respiratory syndrome  
426 coronavirus protein 6 requires the N-terminal hydrophobic region but not C-terminal sorting  
427 motifs. *J Virol* **81**, 11520-5.

428 **O'Keefe, S., Roboti, P., Duah, K. B., Zong, G., Schneider, H., Shi, W. Q. and High, S.**  
429 (2021). Ipomoeassin-F inhibits the in vitro biogenesis of the SARS-CoV-2 spike protein and its  
430 host cell membrane receptor. *J Cell Sci* **134**.

431 **Salamango, D. J., Ikeda, T., Moghadasi, S. A., Wang, J., McCann, J. L., Serebrenik,**  
432 **A. A., Ebrahimi, D., Jarvis, M. C., Brown, W. L. and Harris, R. S.** (2019). HIV-1 Vif Triggers  
433 Cell Cycle Arrest by Degrading Cellular PPP2R5 Phospho-regulators. *Cell Rep* **29**, 1057-  
434 1065.e4.

435 **Silvas, J. A., Vasquez, D. M., Park, J. G., Chiem, K., Allué-Guardia, A., Garcia-**  
436 **Vilanova, A., Platt, R. N., Miorin, L., Kehrer, T., Cupic, A. et al.** (2021). Contribution of SARS-

437 CoV-2 Accessory Proteins to Viral Pathogenicity in K18 Human ACE2 Transgenic Mice. *J Virol*  
438 **95**, e0040221.

439 **Tu, L., Chen, L. and Banfield, D. K.** (2012). A conserved N-terminal arginine-motif in  
440 GOLPH3-family proteins mediates binding to coatomer. *Traffic* **13**, 1496-507.

441 **Wang, J., Chen, J., Enns, C. A. and Mayinger, P.** (2013). The first transmembrane  
442 domain of lipid phosphatase SAC1 promotes Golgi localization. *PLoS One* **8**, e71112.

443 **Wang, P., Ye, Z. and Banfield, D. K.** (2020). A novel mechanism for the retention of  
444 Golgi membrane proteins mediated by the Bre5p/Ubp3p deubiquitinase complex. *Mol Biol Cell*  
445 **31**, 2139-2155.

446 **Xia, H., Cao, Z., Xie, X., Zhang, X., Chen, J. Y., Wang, H., Menachery, V. D.,**  
447 **Rajsbaum, R. and Shi, P. Y.** (2020). Evasion of Type I Interferon by SARS-CoV-2. *Cell Rep* **33**,  
448 108234.

449 **Zhao, J., Falcón, A., Zhou, H., Netland, J., Enjuanes, L., Pérez Breña, P. and**  
450 **Perlman, S.** (2009). Severe acute respiratory syndrome coronavirus protein 6 is required for  
451 optimal replication. *J Virol* **83**, 2368-73.

452 **Zhou, H., Ferraro, D., Zhao, J., Hussain, S., Shao, J., Trujillo, J., Netland, J.,**  
453 **Gallagher, T. and Perlman, S.** (2010). The N-terminal region of severe acute respiratory  
454 syndrome coronavirus protein 6 induces membrane rearrangement and enhances virus  
455 replication. *J Virol* **84**, 3542-51.

456

## 457 **FIGURE LEGENDS**

458 **Figure 1. ORF6 truncation mutants reveal key localization determinants. (A)** ORF6  
459 amino acid alignment of the indicated species with secondary structure prediction. **(B-E)**  
460 Representative live cell fluorescence microscopy images of the indicated mCherry-  
461 tagged ORF6 proteins expressed with the indicated subcellular markers in HeLa cells.

462

463 **Figure 2. Putative amphipathic helices regulate ORF6 localization.** (A) Surface  
464 representation of an ORF6 computational model depicting the hydrophobic surface  
465 index. (B) Helical wheel diagrams highlighting the amino acid composition of putative  
466 ORF6 helices. Positions are colored based on amino acid properties and asterisks  
467 indicate positions where mutations disrupted localization. (C) Representative live cell  
468 fluorescence microscopy images of the indicated mCherry-tagged proteins expressed in  
469 HeLa cells. Dashed red boxes highlight mutants that disrupt localization.

470

471 **Figure 3. SARS-CoV-2 ORF6 is likely a peripheral membrane protein.** (A and B)  
472 Representative live cell fluorescence microscopy images of the indicated mCherry-  
473 tagged proteins co-expressed in HeLa cells with ER and Golgi markers. Samples were  
474 either untreated or treated with indicated combinations of brefeldin A (BFA) and  
475 cycloheximide (CHX). (C) (Top) Representative live cell fluorescence microscopy  
476 images of either untreated or treated cells expressing the indicated mCherry-tagged  
477 proteins co-expressed in HeLa cells with a Golgi marker. (Bottom) Representative flow  
478 cytometry histograms displaying fluorescence intensity from HeLa cells expressing the  
479 indicated protein following treatment, or no treatment, with the indicated compounds.

480

481 **Figure 4. Membrane association of ORF6 is not required for interferon**  
482 **antagonism.** (A and B) Representative live cell fluorescence microscopy images of the  
483 indicated mCherry-tagged proteins expressed in A549 cells stably expressing eGFP-  
484 KPNA2 (A) or following IFN-treatment and STAT1 immuno-labeling (B). (C and D)

485 Quantification of localization patterns for the indicated constructs in A549 cells either  
486 stably expressing eGFP-KPNA2 or following IFN-treatment and STAT1 immuno-  
487 labeling. **(E)** Quantification of fluorescence from an IFN $\beta$ -eGFP reporter plasmid co-  
488 expressed with the indicated ORF6 proteins following RIG-I stimulation. **(F)**  
489 Representative live cell fluorescence microscopy images of A549 cells expressing either  
490 mCherry or the mCherry-3x-peptide construct. **(G)** Quantification of localization patterns  
491 for the indicated constructs in A549 cells.

492

493

**FIGURE 1**

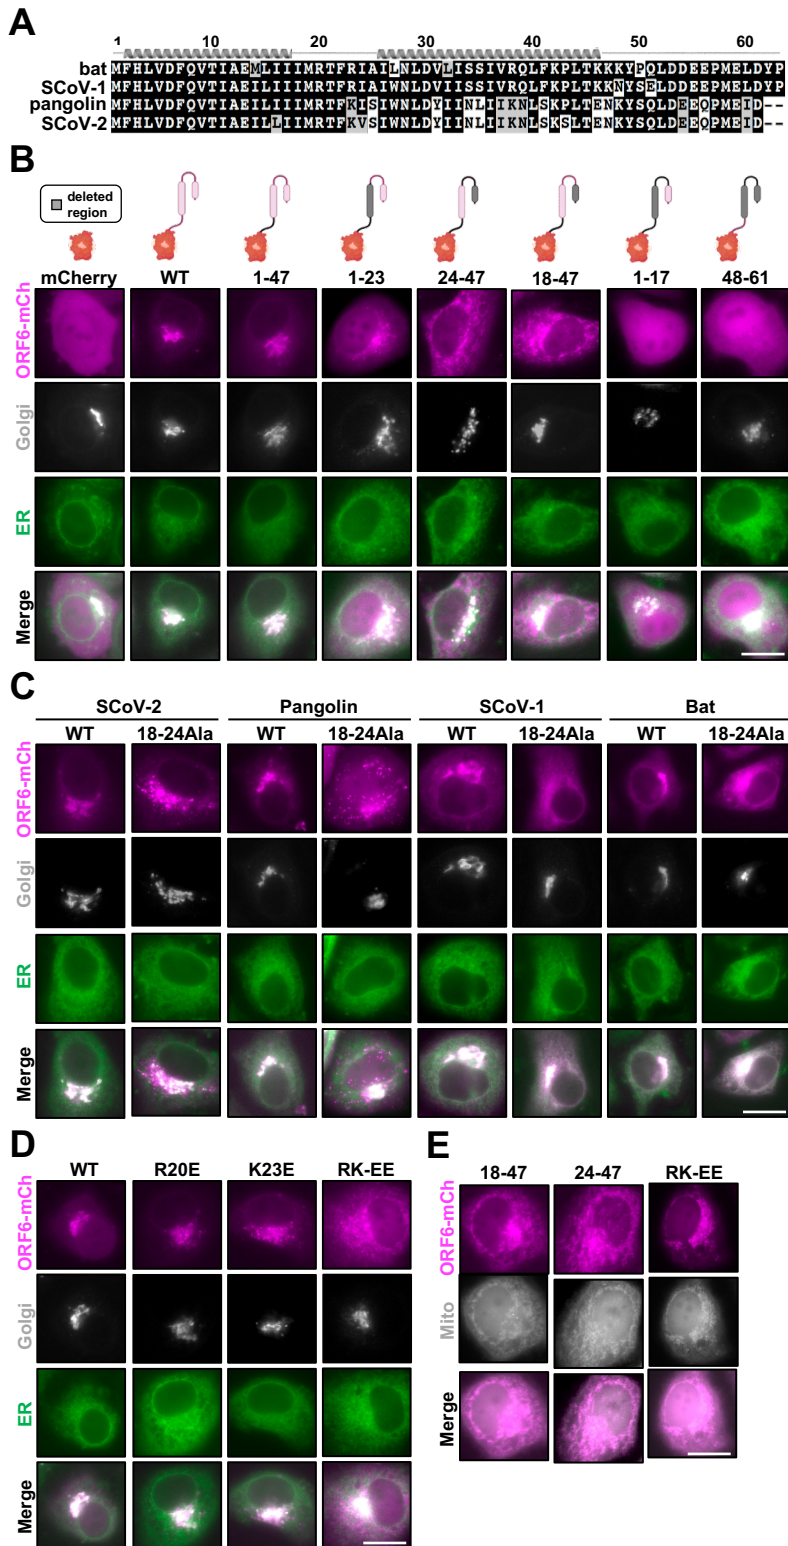

**Figure 1. ORF6 truncation mutants reveal key localization determinants.** (A) ORF6 amino acid alignment of the indicated species with secondary structure prediction. (B-E) Representative live cell fluorescence microscopy images of the indicated mCherry-tagged ORF6 proteins expressed with the indicated subcellular markers in HeLa cells.

**FIGURE 2**

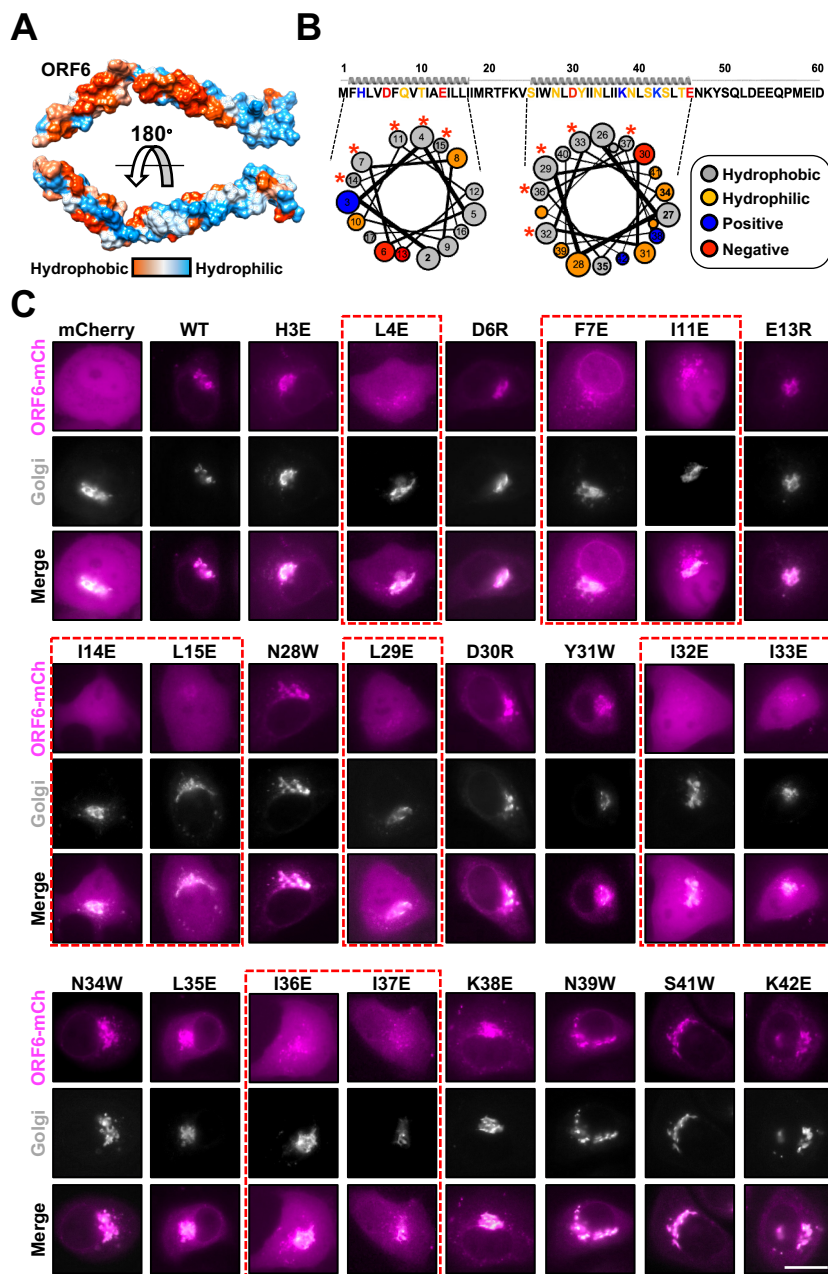

**Figure 2. Putative amphipathic helices regulate ORF6 localization.** (A) Surface representation of an ORF6 computational model depicting the hydrophobic surface index. (B) Helical wheel diagrams highlighting the amino acid composition of putative ORF6 helices. Positions are colored based on amino acid properties and asterisks indicate positions where mutations disrupted localization. (C) Representative live cell fluorescence microscopy images of the indicated mCherry-tagged proteins expressed in HeLa cells. Dashed red boxes highlight mutants that disrupt localization.



**FIGURE 3**

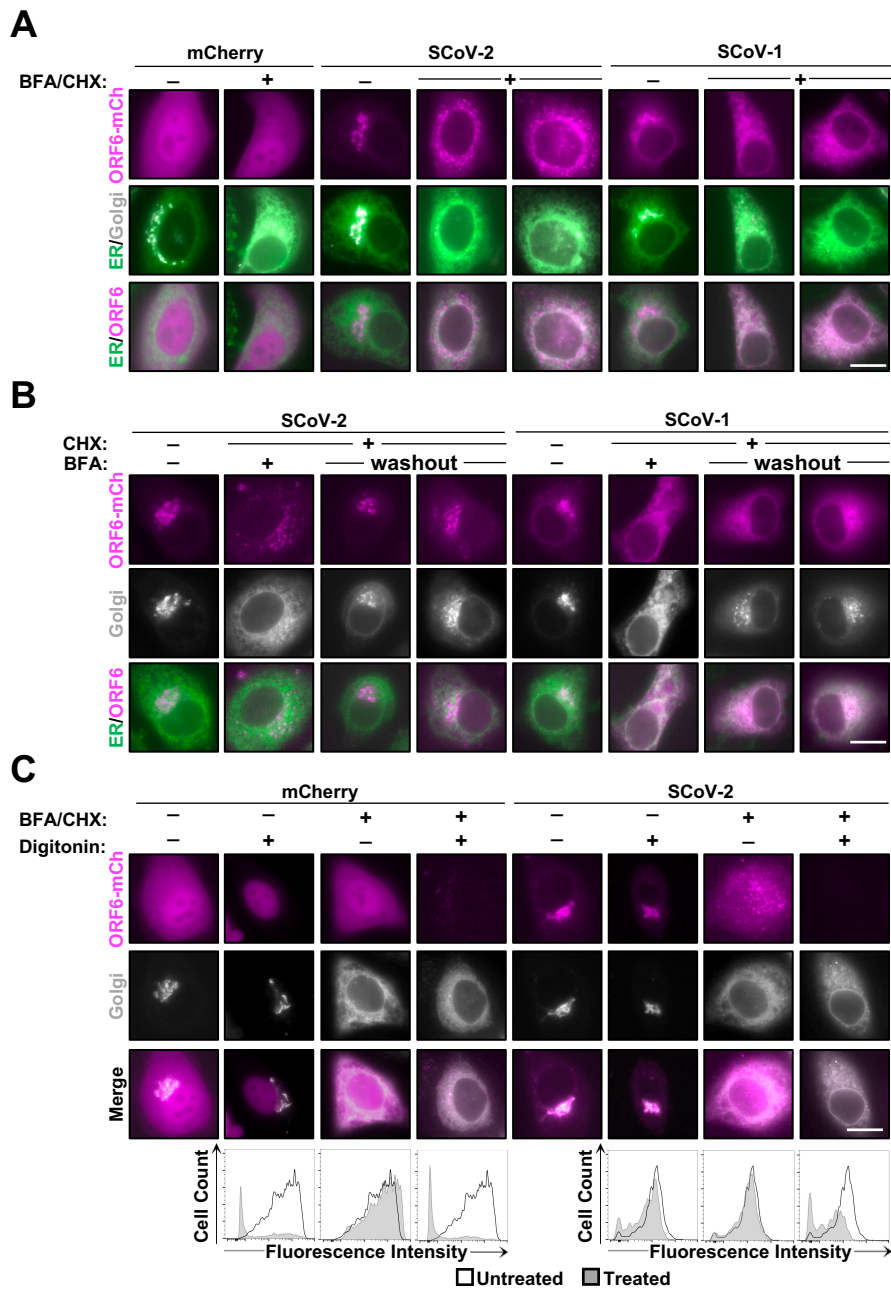

**Figure 3. SARS-CoV-2 ORF6 is likely a peripheral membrane protein. (A and B)** Representative live cell fluorescence microscopy images of the indicated mCherry-tagged proteins co-expressed in HeLa cells with ER and Golgi markers. Samples were either untreated or treated with indicated combinations of brefeldin A (BFA) and cycloheximide (CHX). (C) (Top) Representative live cell fluorescence microscopy images of either untreated or treated cells expressing the indicated mCherry-tagged proteins co-expressed in HeLa cells with a Golgi marker. (Bottom) Representative flow cytometry histograms displaying fluorescence intensity from HeLa cells expressing the indicated protein following treatment, or no treatment, with the indicated compounds.

**FIGURE 4**

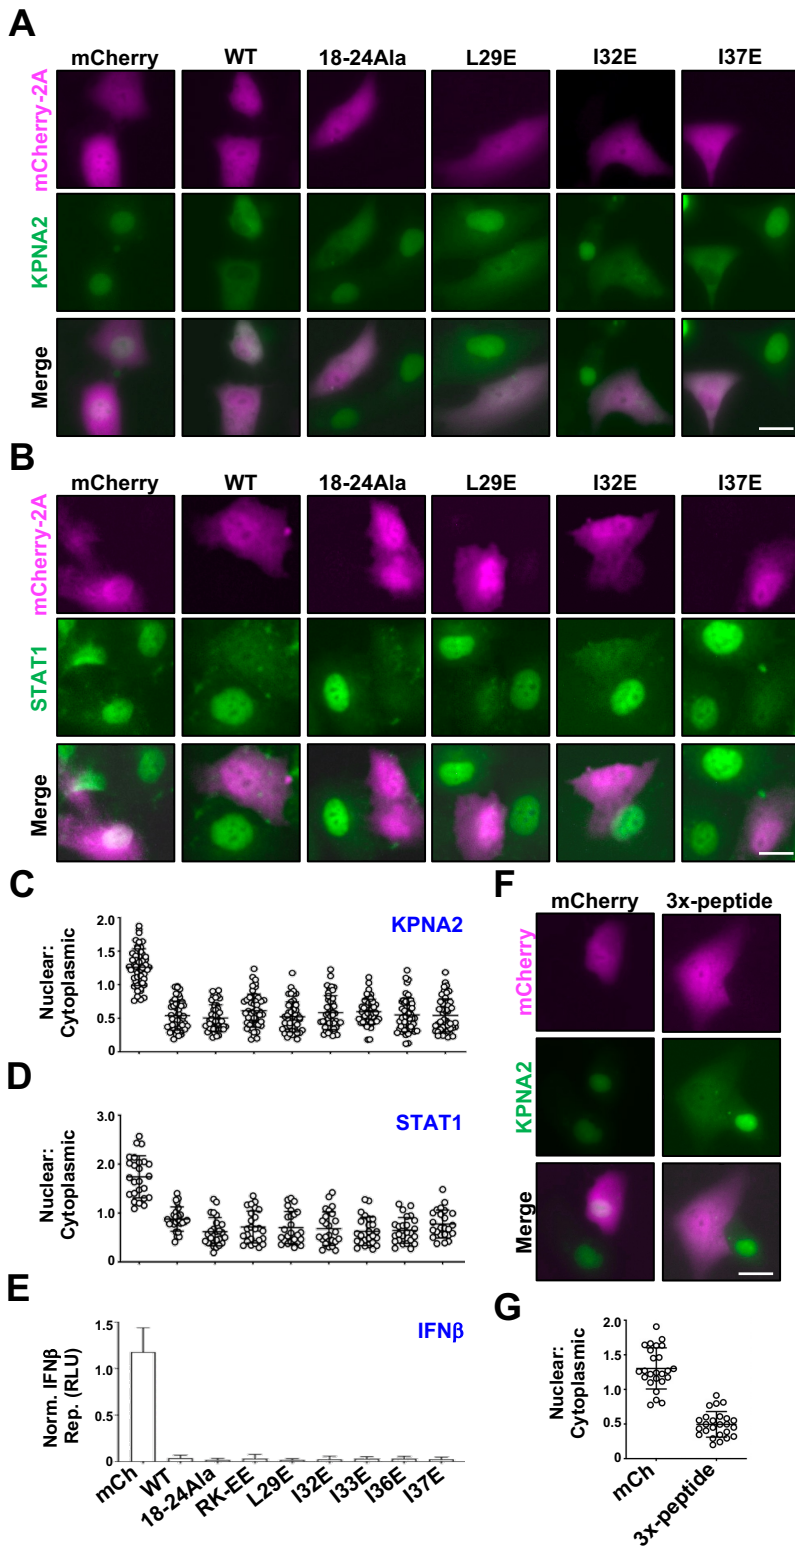

**Figure 4. Membrane association of ORF6 is not required for interferon antagonism.** (A and B) Representative live cell fluorescence microscopy images of the indicated mCherry-tagged proteins expressed in A549 cells stably expressing eGFP-KPNA2 (A) or following IFN-treatment and STAT1 immunolabeling (B). (C and D) Quantification of localization patterns for the indicated constructs in A549 cells either stably expressing eGFP-KPNA2 or following IFN-treatment and STAT1 immunolabeling. (E) Quantification of fluorescence from an IFN $\beta$  eGFP reporter plasmid co-expressed with the indicated ORF6 proteins following RIG-I stimulation. (F) Representative live cell fluorescence microscopy images of A549 cells expressing either mCherry or the mCherry-3x-peptide construct. (G) Quantification of localization patterns for the indicated constructs in A549 cells.
